# Supplementary material for: Continuous production of bimetallic nanoparticles on carbon nanotubes based on 3D-printed microfluidics
Source: Royal Society of Chemistry journal article supplement (doi:10.1039/d3nr05090d), 2024-01-01
Supplement: d3nr05090d1.pdf [file d3nr05090d1.pdf]

## Electronic supplementary information

### Continuous Production of Bimetallic Nanoparticles on Carbon Nanotubes

#### Based on 3D-Printed Microfluidics

Bo Liu,<sup>a,b</sup> Jing Jin,<sup>\*b</sup> Bin Ran,<sup>b</sup> Chaozhan Chen,<sup>b</sup> Jiaqian Li<sup>a</sup>, Ning Qin<sup>a</sup> and Yonggang Zhu<sup>\*b</sup>

<sup>a</sup> School of Energy and Power Engineering, Shandong University, Jinan, 250061, China

<sup>b</sup> School of Mechanical Engineering and Automation, Harbin Institute of Technology,  
Shenzhen, Shenzhen 518055, China

\*Corresponding authors. E-mail: jinjing2020@hit.edu.cn (J. Jin), zhuyonggang@hit.edu.cn (Y. Zhu)

## Contents

|                                                                                    |    |
|------------------------------------------------------------------------------------|----|
| 1. Tensile test specimen of 3D printed material .....                              | 2  |
| 2. Microfluidic synthesis conditions for MWCNTs/Pt-Pd .....                        | 3  |
| 3. Stress-strain curve of tensile test for 3D printed material .....               | 4  |
| 4. 3D printing workflow of design and fabrication for 3D micromixer .....          | 5  |
| 5. Micro-CT scan of the micromixer I.....                                          | 6  |
| 6. Mixing performance of micromixer I.....                                         | 7  |
| 7. Comparison of synthesis throughout for nanoparticles .....                      | 8  |
| 8. TEM images of MWCNTs/Pd-Pt at different precursor flow rate ratios .....        | 9  |
| 9. TEM images of MWCNTs/Pd-Pt at different Pt <sup>4+</sup> flow rate ratios ..... | 10 |
| 10. Comparison of electrochemical performance between modified electrodes .....    | 11 |
| 11. Reproducibility of GCE/MWCNTs/Pt-Pd.....                                       | 12 |
| 12. Reference .....                                                                | 13 |

## 1. Tensile test specimen of 3D printed material

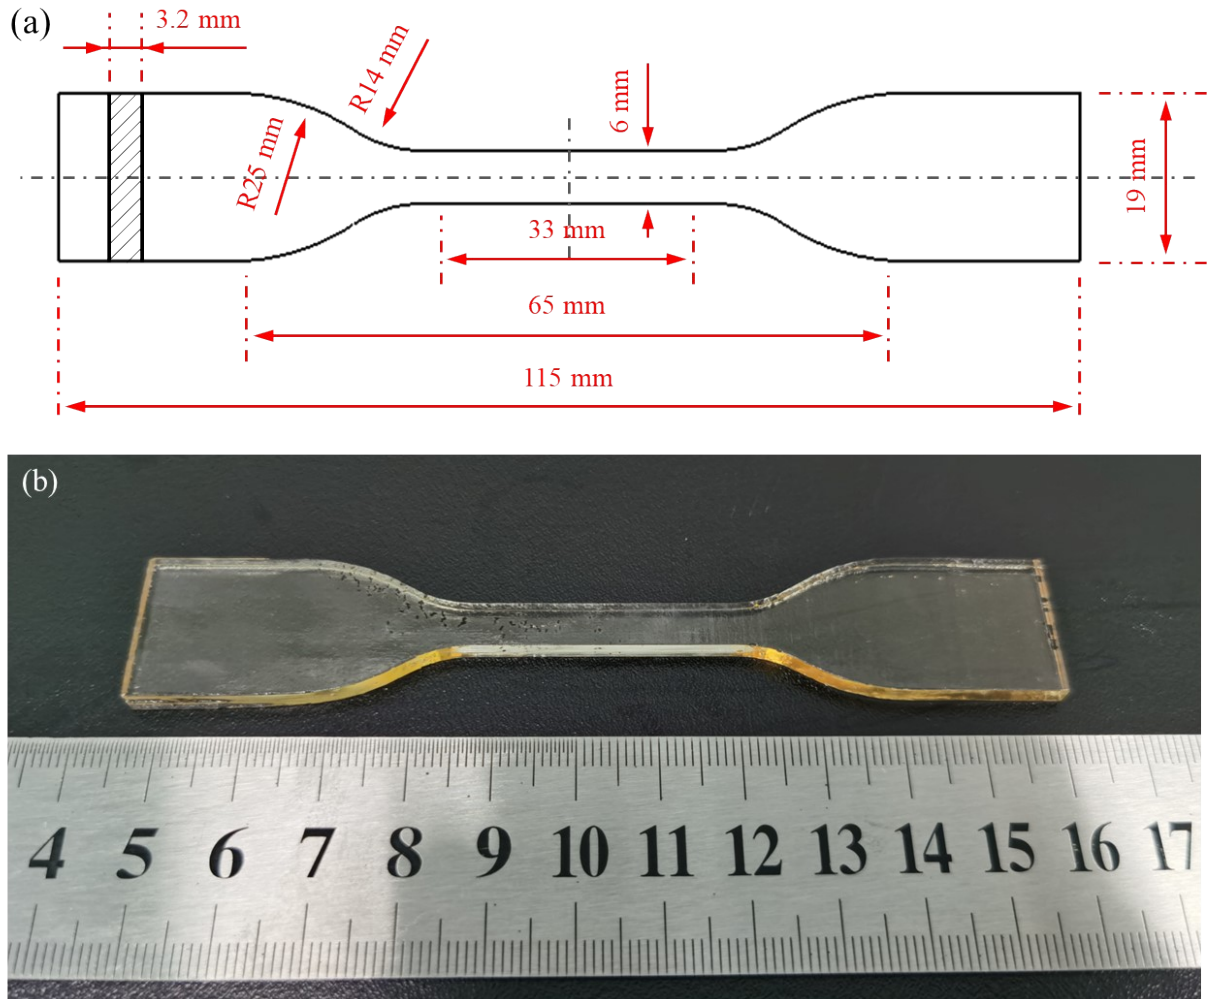

**Fig. S1** Tensile test specimen of 3D printed material. (a) Dimensions of the tensile test specimen; (b) 3D printed specimen for the tensile test.

## 2. Microfluidic synthesis conditions for MWCNTs/Pt-Pd

**Table S1** Microfluidic synthesis conditions for MWCNTs/Pt-Pd.

| Item               | Flow rate ratio of precursor ( $Q_A:Q_B$ ) | Flow rate ratio of micromixer I ( $Q_{A+B}:Q_C$ ) | Reduction concentration ratio ( $C_E:C_C$ ) | Total flow rate ( $\text{mL min}^{-1}$ ) |
|--------------------|--------------------------------------------|---------------------------------------------------|---------------------------------------------|------------------------------------------|
| <i>TFR: 1</i>      | 1:1                                        | 1:1                                               | 4                                           | 1                                        |
| <i>TFR: 5</i>      | 1:1                                        | 1:1                                               | 4                                           | 5                                        |
| <i>TFR: 10</i>     | 1:1                                        | 1:1                                               | 4                                           | 10                                       |
| <i>TFR: 15</i>     | 1:1                                        | 1:1                                               | 4                                           | 15                                       |
| <i>PFRR:0.1</i>    | 1:1                                        | 1:9                                               | 4                                           | 5                                        |
| <i>PFRR:0.3</i>    | 1:1                                        | 3:7                                               | 4                                           | 5                                        |
| <i>PFRR:0.5</i>    | 1:1                                        | 1:1                                               | 4                                           | 5                                        |
| <i>PFRR:0.7</i>    | 1:1                                        | 7:3                                               | 4                                           | 5                                        |
| <i>PFRR:0.9</i>    | 1:1                                        | 9:1                                               | 4                                           | 5                                        |
| <i>Pt-FRR: 0</i>   | 0:1                                        | 1:1                                               | 4                                           | 5                                        |
| <i>Pt-FRR: 0.3</i> | 3:7                                        | 1:1                                               | 4                                           | 5                                        |
| <i>Pt-FRR: 0.5</i> | 1:1                                        | 1:1                                               | 4                                           | 5                                        |
| <i>Pt-FRR: 0.7</i> | 7:3                                        | 1:1                                               | 4                                           | 5                                        |
| <i>Pt-FRR: 1</i>   | 1:0                                        | 1:1                                               | 4                                           | 5                                        |

3. Stress-strain curve of tensile test for 3D printed material

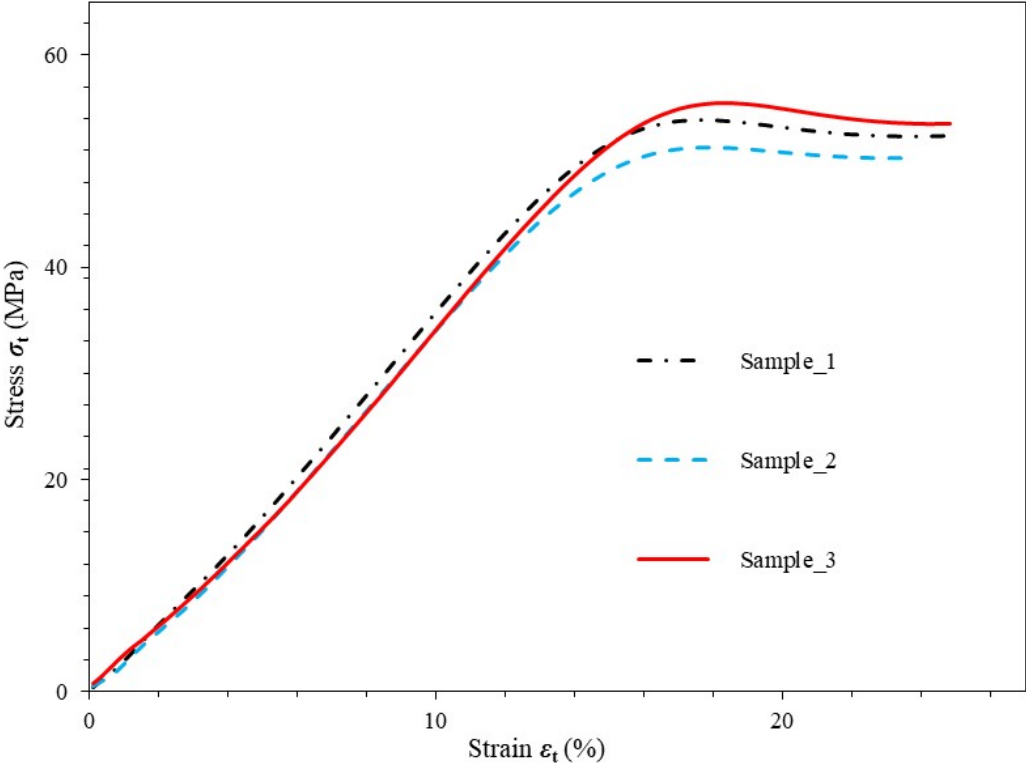

Fig. S2 Stress-strain curve of tensile test for 3D printed material.

4. 3D printing workflow of design and fabrication for 3D micromixer

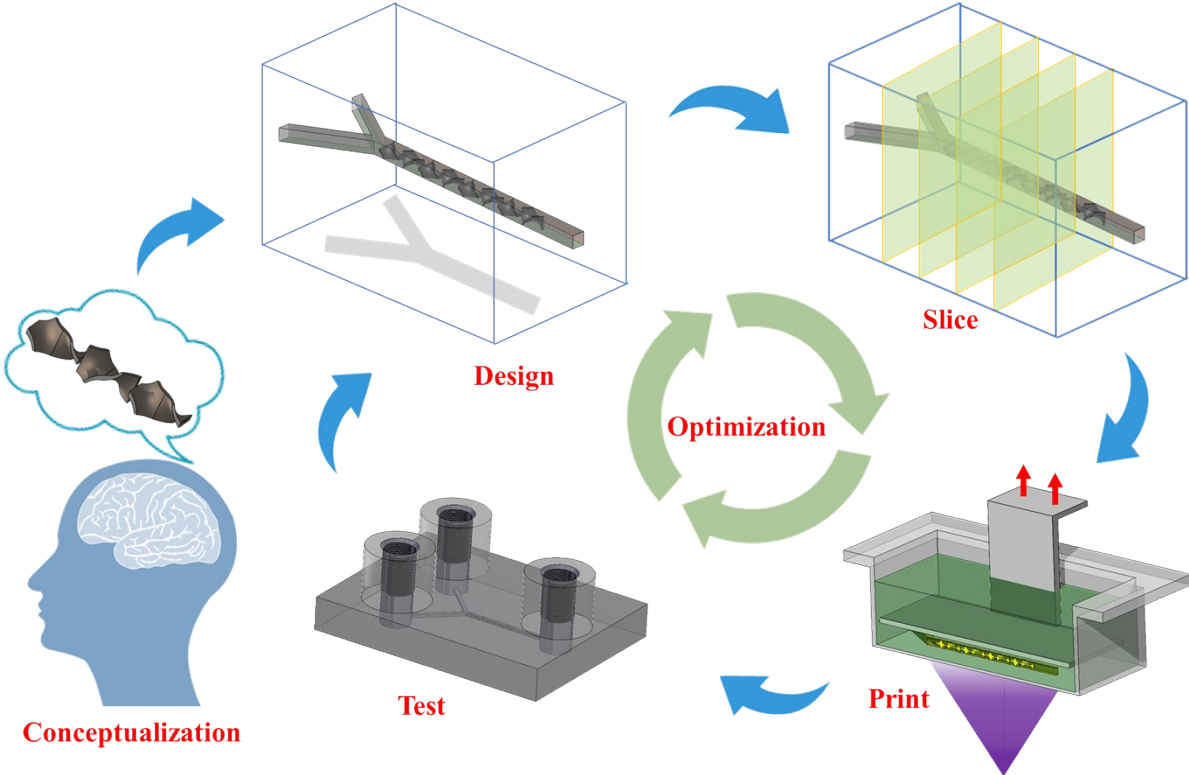

Fig. S3 3D printing workflow of design and fabrication for 3D micromixer.

5. Micro-CT scan of the micromixer I

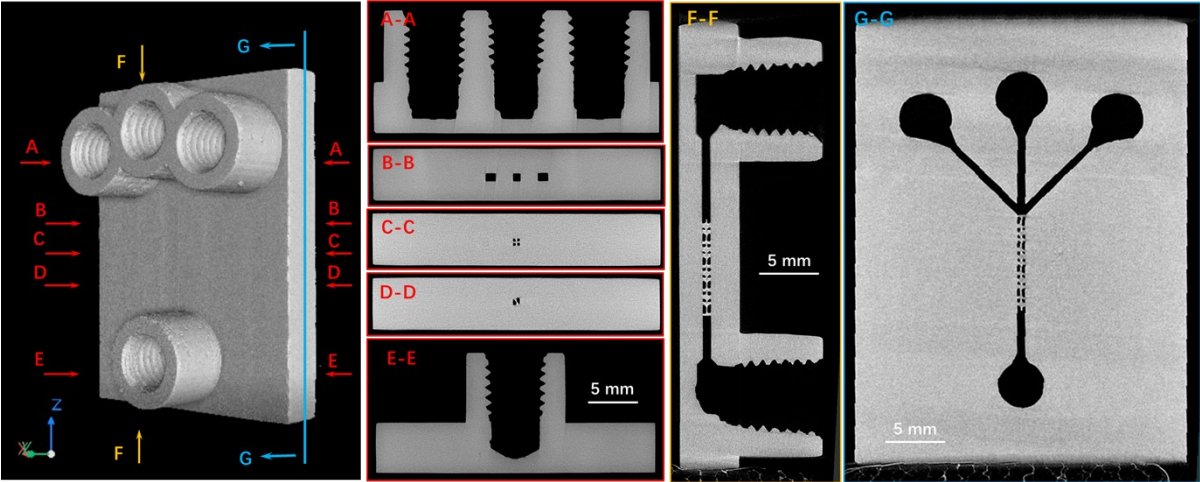

Fig. S4 Micro-CT scan of the micromixer I with different cross-sections.

## 6. Mixing performance of micromixer I

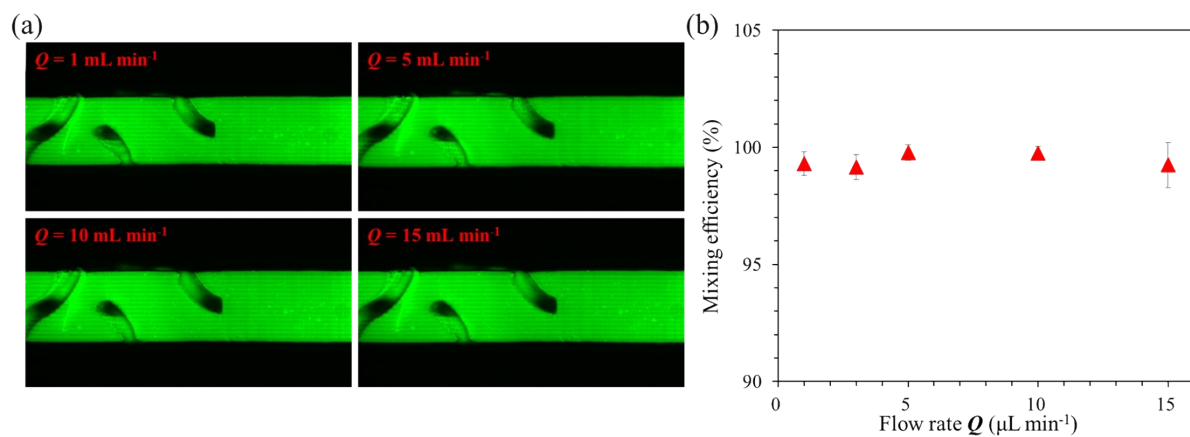

**Fig. S5** Mixing performance of micromixer I. (a) Mixing efficiency of micromixer I with different flow rates; (b) The microscope fluorescein images at the outlet of micromixer I with different flow rates.

## 7. Comparison of synthesis throughout for nanoparticles

**Table S2** Comparison of synthesis throughout for nanoparticles between different micromixers/microreactors.

| Type                    | Fabricated material | Flow rate (mL min <sup>-1</sup> ) | Synthesized material               | Ref.       |
|-------------------------|---------------------|-----------------------------------|------------------------------------|------------|
| Y-shaped micromixer     | PDMS                | 0.05~2                            | Ag NPs                             | [1]        |
| T-shaped microreactor   | PDMS                | 0.1                               | SnS NPs                            | [2]        |
| Cross-shaped micromixer | PTFE                | 1                                 | Pt/TiO <sub>2</sub>                | [3]        |
| Cross-type mixer        | PTFE                | 0.5~1.5                           | Ag/rGO                             | [4]        |
| Spiral microreactor     | PDMS                | 0.035~0.35                        | MNPs@ SiO <sub>2</sub>             | [5]        |
| Spiral microreactor     | PDMS                | 0.1~0.53                          | ZnO NPs                            | [6]        |
| Droplet reactor         | PDMS                | 0.008~0.02                        | SiO <sub>2</sub> NPs               | [7]        |
| Active microreactor     | PDMS                | 0.1~0.5                           | Chitosan NPs                       | [8]        |
| T-shaped micromixer     | PDMS                | 1.5                               | Ag <sub>2</sub> S NPs              | [9]        |
| Y-shaped micromixer     | PDMS                | 0.17~1.7                          | Fe <sub>3</sub> O <sub>4</sub> NPs | [10]       |
| Droplet reactor         | PDMS                | ~0.14                             | Au NPs                             | [11]       |
| Y-shaped micromixer     | PEEK                | ~0.15                             | CuS NPs                            | [12]       |
| Droplet reactor         | PDMS                | 0.01~0.025                        | TiO <sub>2</sub> NPs               | [13]       |
| Focusing microreactor   | PDMS                | 0.01~0.013                        | Organic NPs                        | [14]       |
| T-shaped micromixer     | PTFE                | 0.7                               | MOF capsule                        | [15]       |
| Acoustic micromixer     | PDMS                | 0.01~0.05                         | Budesonide NPs                     | [16]       |
| 3D micromixer           | Resin               | 1~15                              | MWCNTs/Pt-Pd                       | This study |



## 8. TEM images of MWCNTs/Pd-Pt at different precursor flow rate ratios

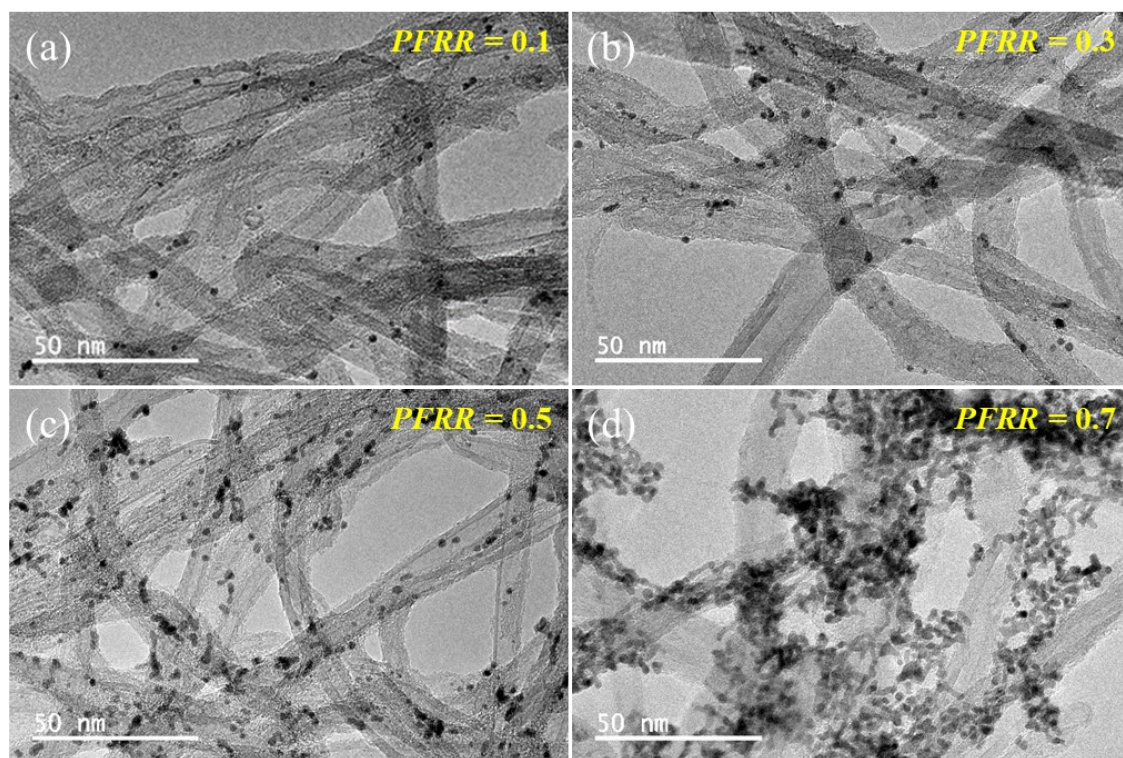

**Fig. S6** TEM images of MWCNTs/Pd-Pt at different precursor flow rate ratios (*PFRR*), (a) 0.1, (b) 0.3, (c) 0.5, and (d) 0.7.

## 9. TEM images of MWCNTs/Pd-Pt at different $\text{Pt}^{4+}$ flow rate ratios

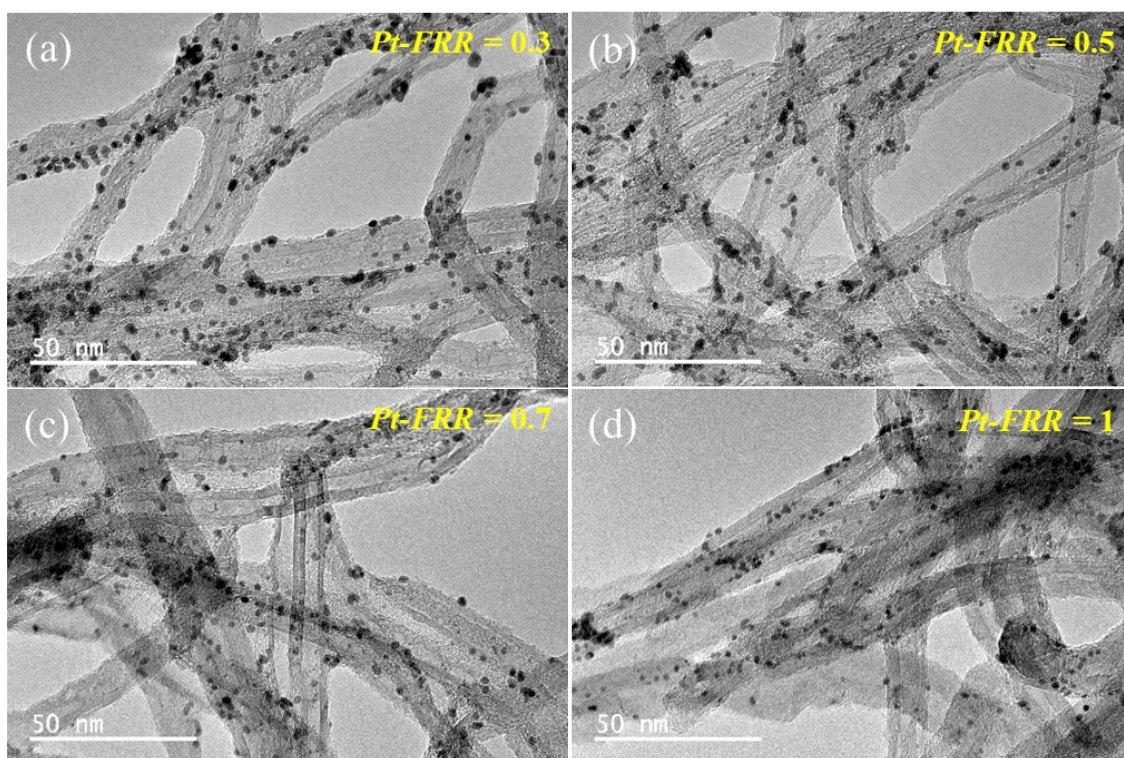

**Fig. S7** TEM images of MWCNTs/Pd-Pt at different  $\text{Pt}^{4+}$  flow rate ratios ( $\text{Pt-FRR}$ ), (a) 0.3, (b) 0.5, (c) 0.7, and (d) 1.

## 10. Comparison of current responses between modified electrodes

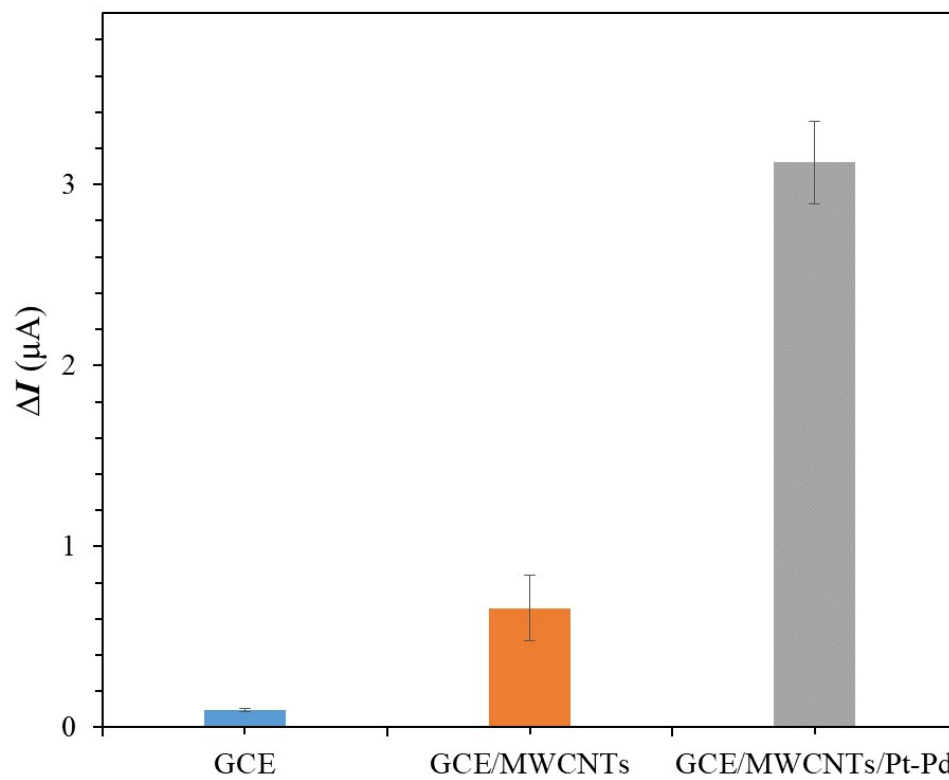

**Fig. S8** Comparison of current responses of GCE, GCE/MWCNTs and GCE/MWCNTs/Pt-Pd under the optimized conditions.

## 11. Reproducibility of GCE/MWCNTs/Pt-Pd

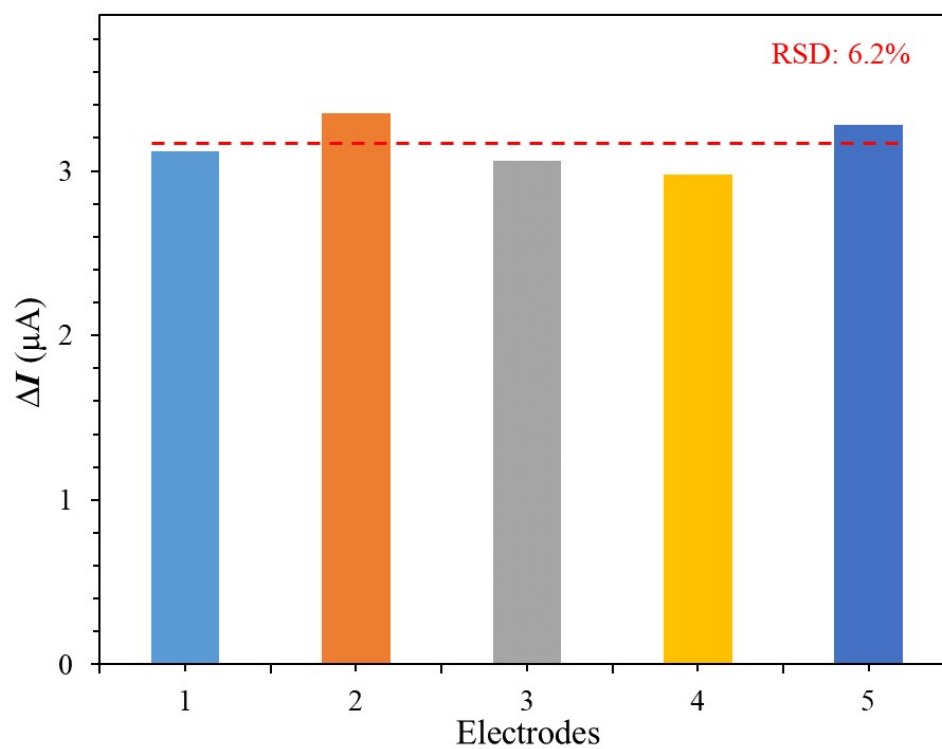

**Fig. S9** Current responses of five different GCE/MWCNTs/Pt-Pd to 100  $\mu\text{M}$   $\text{H}_2\text{O}_2$  in 0.1 M PBS (pH 7.4).

## 12. Reference

- [1] Z. Yang, L. Dong, M. Wang, Y. Jia, C. Wang, P. Li, G. Liu, *Sensors and Actuators a-Physical* **2022**, 346.
- [2] V. Katoch, M. Singh, A. Katoch, B. Prakash, *Materials Letters* **2023**, 333.
- [3] L. Luo, M. Yang, G. Chen, *Chemical Engineering Science* **2022**, 251.
- [4] S. Tao, M. Yang, H. Chen, G. Chen, *Acs Sustainable Chemistry & Engineering* **2018**, 6, 8719.
- [5] N. Hao, Y. Nie, T. Shen, J. X. J. Zhang, *Lab on a Chip* **2018**, 18, 1997.
- [6] N. Hao, Z. Xu, Y. Nie, C. Jin, A. B. Closson, M. Zhang, J. X. J. Zhang, *Chemical Engineering Journal* **2019**, 378.
- [7] R. S. Pessoa, H. S. Maciel, G. Petraconi, M. Massi, A. S. da Silva Sobrinho, *Applied Surface Science* **2008**, 255, 749.
- [8] V. Kamat, I. Marathe, V. Ghormade, D. Bodas, K. Paknikar, *Acs Applied Materials & Interfaces* **2015**, 7, 22839.
- [9] B. Prakash, V. Katoch, A. Shah, M. Sharma, M. M. Devi, J. J. Panda, J. Sharma, A. K. Ganguli, *Photochemistry and Photobiology* **2020**, 96, 1273.
- [10] T. Vu Thi, M. An Ngoc, T. Le The, T. Hoang Van, T. Phung Thi, T. Bui Quang, T. Nguyen Tran, L. Tran Dai, *Journal of Electronic Materials* **2016**, 45, 2576.
- [11] S. Abalde-Cela, P. Taladriz-Blanco, M. G. de Oliveira, C. Abell, *Scientific Reports* **2018**, 8.
- [12] I. Ortiz de Solorzano, M. Prieto, G. Mendoza, T. Alejo, S. Irusta, V. Sebastian, M. Arruebo, *Acs Applied Materials & Interfaces* **2016**, 8, 21545.
- [13] P. Stolzenburg, T. Lorenz, A. Dietzel, G. Garnweitner, *Chemical Engineering Science* **2018**, 191, 500.
- [14] V. Genot, S. Desportes, C. Croushore, J.-P. Lefevre, R. B. Pansu, J. A. Delaire, P. R. von Rohr, *Chemical Engineering Journal* **2010**, 161, 234.
- [15] R. Ameloot, F. Vermoortele, W. Vanhove, M. B. J. Roeyfaers, B. F. Sels, D. E. De Vos, *Nature Chemistry* **2011**, 3, 382.
- [16] L. Nguyen Hoai An, P. Hoang Van, J. Yu, H.-K. Chan, A. Neild, T. Alan, *International Journal of Nanomedicine* **2018**, 13, 1353.
